# Supplementary material for: The burden of mental disorders in the Eastern Mediterranean region, 1990–2015: findings from the global burden of disease 2015 study
Source: Springer Nature journal article supplement (doi:10.1007/s00038-017-1006-1), 2017-08-03
Supplement: MOESM1 [file 13347676]

| Location                                                                                                                                                                                                                                 | Cause   | Data Collection Method | Year Start     | Year End | Sex  | Age Start  | Age End | Representativeness | Urbanity Type                                | Population | Representativeness Covariates                 | Sample Size (people) | Standard Error |
|------------------------------------------------------------------------------------------------------------------------------------------------------------------------------------------------------------------------------------------|---------|------------------------|----------------|----------|------|------------|---------|--------------------|----------------------------------------------|------------|-----------------------------------------------|----------------------|----------------|
| Al-Jawadi AA, Abdul-Rhman S. Prevalence of childhood and early adolescence mental disorders among children attending primary health care centers in Mosul, Iraq: a cross-sectional study. BMC Public Health. 2007; 7: 274                | Iraq    | ADHD                   | Unidentifiable | 2003     | 2004 | Females    | 5       | 9                  | Representative for subnational location only | Unknown    | 1339=0, 1338=0, 239=1, 1188=1, 1337=0         |                      | 0.06627383     |
| Eapen V, Jakka ME, Abu-Saleh MT. Children With Psychiatric Disorders: The Al Ain Community Psychiatric Survey. Can J Psychiatry. 2003; 48(6): 402-7                                                                                      | UAE     | ADHD                   | Unidentifiable | 2001     | 2001 | Both sexes | 6       | 18                 | Representative for subnational location only | Unknown    | 1338=0, 239=1, 1188=0, 1337=0, 1339=0         | 329                  | 0.00602332     |
| Eapen V, Al-Gazali L, Bin-Othman S, Abou-Saleh M. Mental Health Problems Among Schoolchildren in United Arab Emirates: Prevalence and Risk Factors. J Am Acad Child Adolesc Psychiatry. 1998; 37(8): 880-6                               | UAE     | ADHD                   | Unidentifiable | 1995     | 1996 | Both sexes | 6       | 15                 | Representative for subnational location only | Unknown    | 1338=0, 239=1, 1188=0, 1337=0, 1339=0         | 3278                 | 0.00121291     |
| Al-Jawadi AA, Abdul-Rhman S. Prevalence of childhood and early adolescence mental disorders among children attending primary health care centers in Mosul, Iraq: a cross-sectional study. BMC Public Health. 2007; 7: 274                | Iraq    | ADHD                   | Unidentifiable | 2003     | 2004 | Males      | 1       | 4                  | Representative for subnational location only | Unknown    | 1338=0, 239=1, 1188=1, 1337=0, 1339=0         |                      | 0.00214438     |
| Talaei A, Mokhber N, Abdollahian E, Bordbar MR, Salari E. Attention deficit/hyperactivity disorder: a survey on prevalence rate among male subjects in elementary school (7 to 9 years old) in Iran. J Atten Disord. 2010; 13(4): 386-90 | Iran    | ADHD                   | Unidentifiable | 2008     | 2008 | Males      | 7       | 9                  | Representative for subnational location only | Urban      | 1339=0, 1338=0, 239=1, 1188=1, 1337=0         | 714                  | 0.01353115     |
| Al-Jawadi AA, Abdul-Rhman S. Prevalence of childhood and early adolescence mental disorders among children attending primary health care centers in Mosul, Iraq: a cross-sectional study. BMC Public Health. 2007; 7: 274                | Iraq    | ADHD                   | Unidentifiable | 2003     | 2004 | Males      | 5       | 9                  | Representative for subnational location only | Unknown    | 1339=0, 1338=0, 239=1, 1188=1, 1337=0         |                      | 0.00520369     |
| Al-Jawadi AA, Abdul-Rhman S. Prevalence of childhood and early adolescence mental disorders among children attending primary health care centers in Mosul, Iraq: a cross-sectional study. BMC Public Health. 2007; 7: 274                | Iraq    | ADHD                   | Unidentifiable | 2003     | 2004 | Males      | 10      | 15                 | Representative for subnational location only | Unknown    | 1188=1, 1337=0, 1339=0, 1338=0, 239=1         |                      | 0.00917822     |
| Amiri S, Fakhari A, Maheri M, Mohamadpoor Asl A. Attention deficit/hyperactivity disorder in primary school children of Tabriz, North-West Iran. Paediatr Perinat Epidemiol. 2010; 24(6): 597-601                                        | Iran    | ADHD                   | Unidentifiable | 2007     | 2008 | Males      | 7       | 15                 | Representative for subnational location only | Urban      | 239=1, 1188=1, 1337=0, 1339=0, 1338=0         | 877                  | 0.0112208      |
| Amiri S, Fakhari A, Maheri M, Mohamadpoor Asl A. Attention deficit/hyperactivity disorder in primary school children of Tabriz, North-West Iran. Paediatr Perinat Epidemiol. 2010; 24(6): 597-601                                        | Iran    | ADHD                   | Unidentifiable | 2007     | 2008 | Females    | 7       | 15                 | Representative for subnational location only | Urban      | 1338=0, 239=1, 1188=1, 1337=0, 1339=0         | 781                  | 0.00945057     |
| Al-Jawadi AA, Abdul-Rhman S. Prevalence of childhood and early adolescence mental disorders among children attending primary health care centers in Mosul, Iraq: a cross-sectional study. BMC Public Health. 2007; 7: 274                | Iraq    | ADHD                   | Unidentifiable | 2003     | 2004 | Females    | 10      | 15                 | Representative for subnational location only | Unknown    | 1337=0, 1339=0, 1338=0, 239=1, 1188=1         |                      | 0.01078233     |
| Alvabri A, Goodman R. The prevalence of DSM-IV psychiatric disorders among 7-10 year old Yemeni schoolchildren. Soc Psychiatry Psychiatr Epidemiol. 2008; 43(3): 224-30                                                                  | Yemen   | ADHD                   | Unidentifiable | 2002     | 2003 | Males      | 7       | 10                 | Representative for subnational location only | Mixed/both | 1337=0, 1339=0, 1338=0, 239=1, 1188=0         | 608                  | 0.00603424     |
| Alvabri A, Goodman R. The prevalence of DSM-IV psychiatric disorders among 7-10 year old Yemeni schoolchildren. Soc Psychiatry Psychiatr Epidemiol. 2008; 43(3): 224-30                                                                  | Yemen   | ADHD                   | Unidentifiable | 2002     | 2003 | Females    | 7       | 10                 | Representative for subnational location only | Mixed/both | 1188=0, 1337=0, 1339=0, 1338=0, 239=1         | 602                  | 0.00303065     |
| Al-Jawadi AA, Abdul-Rhman S. Prevalence of childhood and early adolescence mental disorders among children attending primary health care centers in Mosul, Iraq: a cross-sectional study. BMC Public Health. 2007; 7: 274                | Iraq    | ADHD                   | Unidentifiable | 2003     | 2004 | Females    | 1       | 4                  | Representative for subnational location only | Unknown    | 1338=0, 239=1, 1188=1, 1337=0, 1339=0         |                      | 0.00590351     |
| World Health Organization (WHO). WHO World Mental Health Surveys: Global Perspectives on the Epidemiology of Mental Disorders. Cambridge, United Kingdom: Cambridge University Press, 2008                                               | Iraq    | Anxiety disorders      | Unidentifiable | 2006     | 2007 | Females    | 65      | 69                 | Nationally representative only               | Mixed/both | 246=0, 1315=0, 1337=0, 1338=0, 1339=0, 1344=0 | 45                   | 0.03671525     |
| World Health Organization (WHO). WHO World Mental Health Surveys: Global Perspectives on the Epidemiology of Mental Disorders. Cambridge, United Kingdom: Cambridge University Press, 2008                                               | Lebanon | Anxiety disorders      | Unidentifiable | 2002     | 2003 | Males      | 35      | 39                 | Nationally representative only               | Mixed/both | 246=0, 1315=0, 1337=0, 1338=0, 1339=0, 1344=0 | 147                  | 0.0125747      |
| World Health Organization (WHO). WHO World Mental Health Surveys: Global Perspectives on the Epidemiology of Mental Disorders. Cambridge, United Kingdom: Cambridge University Press, 2008                                               | Lebanon | Anxiety disorders      | Unidentifiable | 2002     | 2003 | Males      | 40      | 44                 | Nationally representative only               | Mixed/both | 246=0, 1315=0, 1337=0, 1338=0, 1339=0, 1344=0 | 140                  | 0.017273032    |
| Ghubash R, Hamdi E, Bebbington P. The Dubai Community Psychiatric Survey: I. Prevalence and socio-demographic correlates. Soc Psychiatry Psychiatr Epidemiol. 1992; 27(2): 53-61                                                         | UAE     | Anxiety disorders      | Unidentifiable | 1989     | 1990 | Females    | 16      | 64                 | Representative for subnational location only | Mixed/both | 246=1, 1315=0, 1337=0, 1338=0, 1339=0, 1344=0 | 300                  | 0.01547882     |
| World Health Organization (WHO). WHO World Mental Health Surveys: Global Perspectives on the Epidemiology of Mental Disorders. Cambridge, United Kingdom: Cambridge University Press, 2008                                               | Lebanon | Anxiety disorders      | Unidentifiable | 2002     | 2003 | Males      | 45      | 49                 | Nationally representative only               | Mixed/both | 246=0, 1315=0, 1337=0, 1338=0, 1339=0, 1344=0 | 133                  | 0.01257303     |
| World Health Organization (WHO). WHO World Mental Health Surveys: Global Perspectives on the Epidemiology of Mental Disorders. Cambridge, United Kingdom: Cambridge University Press, 2008                                               | Lebanon | Anxiety disorders      | Unidentifiable | 2002     | 2003 | Males      | 50      | 54                 | Nationally representative only               | Mixed/both | 246=0, 1315=0, 1337=0, 1338=0, 1339=0, 1344=0 | 96                   | 0.02559049     |
| World Health Organization (WHO). WHO World Mental Health Surveys: Global Perspectives on the Epidemiology of Mental Disorders. Cambridge, United Kingdom: Cambridge University Press, 2008                                               | Lebanon | Anxiety disorders      | Unidentifiable | 2002     | 2003 | Males      | 55      | 59                 | Nationally representative only               | Mixed/both | 246=0, 1315=0, 1337=0, 1338=0, 1339=0, 1344=0 | 69                   | 0.03172283     |
| World Health Organization (WHO). WHO World Mental Health Surveys: Global Perspectives on the Epidemiology of Mental Disorders. Cambridge, United Kingdom: Cambridge University Press, 2008                                               | Lebanon | Anxiety disorders      | Unidentifiable | 2002     | 2003 | Males      | 60      | 64                 | Nationally representative only               | Mixed/both | 246=0, 1315=0, 1337=0, 1338=0, 1339=0, 1344=0 | 77                   | 0.01547595     |
| World Health Organization (WHO). WHO World Mental Health Surveys: Global Perspectives on the Epidemiology of Mental Disorders. Cambridge, United Kingdom: Cambridge University Press, 2008                                               | Lebanon | Anxiety disorders      | Unidentifiable | 2002     | 2003 | Males      | 65      | 69                 | Nationally representative only               | Mixed/both | 246=0, 1315=0, 1337=0, 1338=0, 1339=0, 1344=0 | 70                   | 0.0340987      |
| World Health Organization (WHO). WHO World Mental Health Surveys: Global Perspectives on the Epidemiology of Mental Disorders. Cambridge, United Kingdom: Cambridge University Press, 2008                                               | Lebanon | Anxiety disorders      | Unidentifiable | 2002     | 2003 | Males      | 70      | 74                 | Nationally representative only               | Mixed/both | 246=0, 1315=0, 1337=0, 1338=0, 1339=0, 1344=0 | 70                   | 0.01399974     |
| World Health Organization (WHO). WHO World Mental Health Surveys: Global Perspectives on the Epidemiology of Mental Disorders. Cambridge, United Kingdom: Cambridge University Press, 2008                                               | Lebanon | Anxiety disorders      | Unidentifiable | 2002     | 2003 | Females    | 45      | 49                 | Nationally representative only               | Mixed/both | 246=0, 1315=0, 1337=0, 1338=0, 1339=0, 1344=0 | 110                  | 0.02481964     |
| World Health Organization (WHO). WHO World Mental Health Surveys: Global Perspectives on the Epidemiology of Mental Disorders. Cambridge, United Kingdom: Cambridge University Press, 2008                                               | Lebanon | Anxiety disorders      | Unidentifiable | 2002     | 2003 | Males      | 75      | 79                 | Nationally representative only               | Mixed/both | 246=0, 1315=0, 1337=0, 1338=0, 1339=0, 1344=0 | 41                   | 0.023902       |
| World Health Organization (WHO). WHO World Mental Health Surveys: Global Perspectives on the Epidemiology of Mental Disorders. Cambridge, United Kingdom: Cambridge University Press, 2008                                               | Lebanon | Anxiety disorders      | Unidentifiable | 2002     | 2003 | Females    | 30      | 34                 | Nationally representative only               | Mixed/both | 246=0, 1315=0, 1337=0, 1338=0, 1339=0, 1344=0 | 171                  | 0.02163698     |
| World Health Organization (WHO). WHO World Mental Health Surveys: Global Perspectives on the Epidemiology of Mental Disorders. Cambridge, United Kingdom: Cambridge University Press, 2008                                               | Iraq    | Anxiety disorders      | Unidentifiable | 2006     | 2007 | Males      | 60      | 64                 | Nationally representative only               | Mixed/both | 246=0, 1315=0, 1337=0, 1338=0, 1339=0, 1344=0 | 52                   | 0.0273958      |
| World Health Organization (WHO). WHO World Mental Health Surveys: Global Perspectives on the Epidemiology of Mental Disorders. Cambridge, United Kingdom: Cambridge University Press, 2008                                               | Lebanon | Anxiety disorders      | Unidentifiable | 2002     | 2003 | Females    | 20      | 24                 | Nationally representative only               | Mixed/both | 246=0, 1315=0, 1337=0, 1338=0, 1339=0, 1344=0 | 168                  | 0.02184298     |
| World Health Organization (WHO). WHO World Mental Health Surveys: Global Perspectives on the Epidemiology of Mental Disorders. Cambridge, United Kingdom: Cambridge University Press, 2008                                               | Iraq    | Anxiety disorders      | Unidentifiable | 2006     | 2007 | Males      | 40      | 44                 | Nationally representative only               | Mixed/both | 246=0, 1315=0, 1337=0, 1338=0, 1339=0, 1344=0 | 229                  | 0.01348989     |
| World Health Organization (WHO). WHO World Mental Health Surveys: Global Perspectives on the Epidemiology of Mental Disorders. Cambridge, United Kingdom: Cambridge University Press, 2008                                               | Lebanon | Anxiety disorders      | Unidentifiable | 2002     | 2003 | Females    | 25      | 29                 | Nationally representative only               | Mixed/both | 246=0, 1315=0, 1337=0, 1338=0, 1339=0, 1344=0 | 139                  | 0.0269492      |
| World Health Organization (WHO). WHO World Mental Health Surveys: Global Perspectives on the Epidemiology of Mental Disorders. Cambridge, United Kingdom: Cambridge University Press, 2008                                               | Lebanon | Anxiety disorders      | Unidentifiable | 2002     | 2003 | Females    | 40      | 44                 | Nationally representative only               | Mixed/both | 246=0, 1315=0, 1337=0, 1338=0, 1339=0, 1344=0 | 179                  | 0.0212252      |
| World Health Organization (WHO). WHO World Mental Health Surveys: Global Perspectives on the Epidemiology of Mental Disorders. Cambridge, United Kingdom: Cambridge University Press, 2008                                               | Lebanon | Anxiety disorders      | Unidentifiable | 2002     | 2003 | Males      | 50      | 54                 | Nationally representative only               | Mixed/both | 246=0, 1315=0, 1337=0, 1338=0, 1339=0, 1344=0 | 110                  | 0.0285736      |
| World Health Organization (WHO). WHO World Mental Health Surveys: Global Perspectives on the Epidemiology of Mental Disorders. Cambridge, United Kingdom: Cambridge University Press, 2008                                               | Lebanon | Anxiety disorders      | Unidentifiable | 2002     | 2003 | Females    | 55      | 59                 | Nationally representative only               | Mixed/both | 246=0, 1315=0, 1337=0, 1338=0, 1339=0, 1344=0 | 93                   | 0.01474752     |
| World Health Organization (WHO). WHO World Mental Health Surveys: Global Perspectives on the Epidemiology of Mental Disorders. Cambridge, United Kingdom: Cambridge University Press, 2008                                               | Lebanon | Anxiety disorders      | Unidentifiable | 2002     | 2003 | Females    | 60      | 64                 | Nationally representative only               | Mixed/both | 246=0, 1315=0, 1337=0, 1338=0, 1339=0, 1344=0 | 108                  | 0.02408832     |
| World Health Organization (WHO). WHO World Mental Health Surveys: Global Perspectives on the Epidemiology of Mental Disorders. Cambridge, United Kingdom: Cambridge University Press, 2008                                               | Lebanon | Anxiety disorders      | Unidentifiable | 2002     | 2003 | Females    | 65      | 69                 | Nationally representative only               | Mixed/both | 246=0, 1315=0, 1337=0, 1338=0, 1339=0, 1344=0 | 70                   | 0.04243962     |
| Ghanem M, Gadallah M, Meky FA, Mourad S, El-Kholy G. National Survey of Prevalence of Mental Disorders in Egypt: preliminary survey. East Mediterr Health J. 2009; 15(1): 65-75                                                          | Egypt   | Anxiety disorders      | Unidentifiable | 2003     | 2003 | Both sexes | 18      | 64                 | Nationally representative only               | Mixed/both | 246=0, 1315=0, 1337=0, 1338=0, 1339=0, 1344=0 | 14640                | 0.00175523     |
| World Health Organization (WHO). WHO World Mental Health Surveys: Global Perspectives on the Epidemiology of Mental Disorders. Cambridge, United Kingdom: Cambridge University Press, 2008                                               | Lebanon | Anxiety disorders      | Unidentifiable | 2002     | 2003 | Females    | 70      | 74                 | Nationally representative only               | Mixed/both | 246=0, 1315=0, 1337=0, 1338=0, 1339=0, 1344=0 | 60                   | 0.03734548     |
| World Health Organization (WHO). WHO World Mental Health Surveys: Global Perspectives on the Epidemiology of Mental Disorders. Cambridge, United Kingdom: Cambridge University Press, 2008                                               | Iraq    | Anxiety disorders      | Unidentifiable | 2006     | 2007 | Females    | 25      | 29                 | Nationally representative only               | Mixed/both | 246=0, 1315=0, 1337=0, 1338=0, 1339=0, 1344=0 | 321                  | 0.01752104     |
| World Health Organization (WHO). WHO World Mental Health Surveys: Global Perspectives on the Epidemiology of Mental Disorders. Cambridge, United Kingdom: Cambridge University Press, 2008                                               | Lebanon | Anxiety disorders      | Unidentifiable | 2002     | 2003 | Females    | 75      | 79                 | Nationally representative only               | Mixed/both | 246=0, 1315=0, 1337=0, 1338=0, 1339=0, 1344=0 | 45                   | 0.05640674     |
| World Health Organization (WHO). WHO World Mental Health Surveys: Global Perspectives on the Epidemiology of Mental Disorders. Cambridge, United Kingdom: Cambridge University Press, 2008                                               | Iraq    | Anxiety disorders      | Unidentifiable | 2006     | 2007 | Males      | 40      | 44                 | Nationally representative only               | Mixed/both | 246=0, 1315=0, 1337=0, 1338=0, 1339=0, 1344=0 | 219                  | 0.02067185     |
| World Health Organization (WHO). WHO World Mental Health Surveys: Global Perspectives on the Epidemiology of Mental Disorders. Cambridge, United Kingdom: Cambridge University Press, 2008                                               | Iraq    | Anxiety disorders      | Unidentifiable | 2006     | 2007 | Females    | 18      | 18                 | Nationally representative only               | Mixed/both | 246=0, 1315=0, 1337=0, 1338=0, 1339=0, 1344=0 | 53                   | 0.06415071     |
| World Health Organization (WHO). WHO World Mental Health Surveys: Global Perspectives on the Epidemiology of Mental Disorders. Cambridge, United Kingdom: Cambridge University Press, 2008                                               | Iraq    | Anxiety disorders      | Unidentifiable | 2006     | 2007 | Males      | 19      | 19                 | Nationally representative only               | Mixed/both | 246=0, 1315=0, 1337=0, 1338=0, 1339=0, 1344=0 | 68                   | 0.02943438     |
| World Health Organization (WHO). WHO World Mental Health Surveys: Global Perspectives on the Epidemiology of Mental Disorders. Cambridge, United Kingdom: Cambridge University Press, 2008                                               | Iraq    | Anxiety disorders      | Unidentifiable | 2006     | 2007 | Males      | 20      | 24                 | Nationally representative only               | Mixed/both | 246=0, 1315=0, 1337=0, 1338=0, 1339=0, 1344=0 | 301                  | 0.00940322     |
| World Health Organization (WHO). WHO World Mental Health Surveys: Global Perspectives on the Epidemiology of Mental Disorders. Cambridge, United Kingdom: Cambridge University Press, 2008                                               | Iraq    | Anxiety disorders      | Unidentifiable | 2006     | 2007 | Males      | 25      | 29                 | Nationally representative only               | Mixed/both | 246=0, 1315=0, 1337=0, 1338=0, 1339=0, 1344=0 | 284                  | 0.01099897     |
| World Health Organization (WHO). WHO World Mental Health Surveys: Global Perspectives on the Epidemiology of Mental Disorders. Cambridge, United Kingdom: Cambridge University Press, 2008                                               | Iraq    | Anxiety disorders      | Unidentifiable | 2006     | 2007 | Males      | 30      | 34                 | Nationally representative only               | Mixed/both | 246=0, 1315=0, 1337=0, 1338=0, 1339=0, 1344=0 | 300                  | 0.00752888     |
| World Health Organization (WHO). WHO World Mental Health Surveys: Global Perspectives on the Epidemiology of Mental Disorders. Cambridge, United Kingdom: Cambridge University Press, 2008                                               | Iraq    | Anxiety disorders      | Unidentifiable | 2006     | 2007 | Males      | 35      | 39                 | Nationally representative only               | Mixed/both | 246=0, 1315=0, 1337=0, 1338=0, 1339=0, 1344=0 | 310                  | 0.00957516     |
| World Health Organization (WHO). WHO World Mental Health Surveys: Global Perspectives on the Epidemiology of Mental Disorders. Cambridge, United Kingdom: Cambridge University Press, 2008                                               | Lebanon | Anxiety disorders      | Unidentifiable | 2002     | 2003 | Females    | 35      | 39                 | Nationally representative only               | Mixed/both | 246=0, 1315=0, 1337=0, 1338=0, 1339=0, 1344=0 | 222                  | 0.02170201     |
| World Health Organization (WHO). WHO World Mental Health Surveys: Global Perspectives on the Epidemiology of Mental Disorders. Cambridge, United Kingdom: Cambridge University Press, 2008                                               | Iraq    | Anxiety disorders      | Unidentifiable | 2006     | 2007 | Males      | 45      | 49                 | Nationally representative only               | Mixed/both | 246=0, 1315=0, 1337=0, 1338=0, 1339=0, 1344=0 | 137                  | 0.01961415     |
| World Health Organization (WHO). WHO World Mental Health Surveys: Global Perspectives on the Epidemiology of Mental Disorders. Cambridge, United Kingdom: Cambridge University Press, 2008                                               | Iraq    | Anxiety disorders      | Unidentifiable | 2006     | 2007 | Males      | 50      | 54                 | Nationally representative only               | Mixed/both | 246=0, 1315=0, 1337=0, 1338=0, 1339=0, 1344=0 | 129                  | 0.00941246     |
| World Health Organization (WHO). WHO World Mental Health Surveys: Global Perspectives on the Epidemiology of Mental Disorders. Cambridge, United Kingdom: Cambridge University Press, 2008                                               | Iraq    | Anxiety disorders      | Unidentifiable | 2006     | 2007 | Males      | 55      | 59                 | Nationally representative only               | Mixed/both | 246=0, 1315=0, 1337=0, 1338=0, 1339=0, 1344=0 | 103                  | 0.01330849     |
| World Health Organization (WHO). WHO World Mental Health Surveys: Global Perspectives on the Epidemiology of Mental Disorders. Cambridge, United Kingdom: Cambridge University Press, 2008                                               | Lebanon | Anxiety disorders      | Unidentifiable | 2002     | 2003 | Males      | 20      | 24                 | Nationally representative only               | Mixed/both | 246=0, 1315=0, 1337=0, 1338=0, 1339=0, 1344=0 | 125                  | 0.01715411     |
| World Health Organization (WHO). WHO World Mental Health Surveys: Global Perspectives on the Epidemiology of Mental Disorders. Cambridge, United Kingdom: Cambridge University Press, 2008                                               | Iraq    | Anxiety disorders      | Unidentifiable | 2006     | 2007 | Males      | 65      | 69                 | Nationally representative only               | Mixed/both | 246=0, 1315=0, 1337=0, 1338=0, 1339=0, 1344=0 | 55                   | 0.02308765     |
| World Health Organization (WHO). WHO World Mental Health Surveys: Global Perspectives on the Epidemiology of Mental Disorders. Cambridge, United Kingdom: Cambridge University Press, 2008                                               | Iraq    | Anxiety disorders      | Unidentifiable | 2006     | 2007 | Females    | 18      | 18                 | Nationally representative only               | Mixed/both | 246=0, 1315=0, 1337=0, 1338=0, 1339=0, 1344=0 | 69                   | 0.04678386     |
| World Health Organization (WHO). WHO World Mental Health Surveys: Global Perspectives on the Epidemiology of Mental Disorders. Cambridge, United Kingdom: Cambridge University Press, 2008                                               | Iraq    | Anxiety disorders      | Unidentifiable | 2006     | 2007 | Females    | 19      | 19                 | Nationally representative only               | Mixed/both | 246=0, 1315=0, 1337=0, 1338=0, 1339=0, 1344=0 | 55                   | 0.04625859     |
| World Health Organization (WHO). WHO World Mental Health Surveys: Global Perspectives on the Epidemiology of Mental Disorders. Cambridge, United Kingdom: Cambridge University Press, 2008                                               | Iraq    | Anxiety disorders      | Unidentifiable | 2006     | 2007 | Females    | 20      | 24                 | Nationally representative only               | Mixed/both | 246=0, 1315=0, 1337=0, 1338=0, 1339=0, 1344=0 | 319                  | 0.01757575     |
| World Health Organization (WHO). WHO World Mental Health Surveys: Global Perspectives on the Epidemiology of Mental Disorders. Cambridge, United Kingdom: Cambridge University Press, 2008                                               | Lebanon | Anxiety disorders      | Unidentifiable | 2002     | 2003 | Males      | 25      | 29                 | Nationally representative only               | Mixed/both | 246=0, 1315=0, 1337=0, 1338=0, 1339=0, 1344=0 | 114                  | 0.01986633     |
| World Health Organization (WHO). WHO World Mental Health Surveys: Global Perspectives on the Epidemiology of Mental Disorders. Cambridge, United Kingdom: Cambridge University Press, 2008                                               | Iraq    | Anxiety disorders      | Unidentifiable | 2006     | 2007 | Females    | 30      | 34                 | Nationally representative only               | Mixed/both | 246=0, 1315                                   |                      |                |
